# Supplementary material for: Personal Care Product Use in Pregnancy and the Postpartum Period: Implications for Exposure Assessment
Source: PubMed Central journal article supplement (PMC4730496; doi:10.3390/ijerph13010105), 2016-01-06
Supplement: ijerph-13-00105-s001.pdf [file ijerph-13-00105-s001.pdf]

# Supplementary Materials: Personal Care Product Use in Pregnancy and the Postpartum Period: Implications for Exposure Assessment

Carly Lang <sup>1</sup>, Mandy Fisher <sup>2,\*</sup>, Angelica Neisa <sup>2</sup>, Leona MacKinnon <sup>2</sup>, Sandra Kuchta <sup>2</sup>, Susan MacPherson <sup>2</sup>, Adam Probert <sup>2</sup> and Tye E. Arbuckle <sup>2</sup>

**Table S1.** Unique PCP co-use combinations for participants during the weekday 48 h time period (T1A). 62 of the 63 participants reported PCP co-use (use of more than 1 PCP in a 48 h time period). There were 56 unique co-use combinations for the 62 participants.

| PCP Combination                                                                                   | No. Users | % Users |
|---------------------------------------------------------------------------------------------------|-----------|---------|
| anti, oral, condit, shampoo, bodysoap, soap, eyemakeup, makeup, face, lotion, hair, skinclea, lip | 3         | 4.8     |
| anti, oral, condit, shampoo, bodysoap, face, lotion, skinclea                                     | 2         | 3.2     |
| anti, oral, condit, shampoo, bodysoap, eyemakeup, makeup, face, lotion, hair, skinclea            | 2         | 3.2     |
| anti, oral, condit, shampoo, bodysoap, soap, face, skinclea                                       | 2         | 3.2     |
| anti, oral, condit, shampoo, bodysoap, soap, eyemakeup, makeup, face, lotion, skinclea, lip       | 2         | 3.2     |
| bodysoap, soap                                                                                    | 1         | 1.6     |
| oral, makeup, eyemakeup, skinclea                                                                 | 1         | 1.6     |
| oral, bodysoap                                                                                    | 1         | 1.6     |
| oral, shampoo, soap, skinclea                                                                     | 1         | 1.6     |
| oral, shampoo, bodysoap                                                                           | 1         | 1.6     |
| oral, shampoo, bodysoap, eyemakeup, face, skinclea, lip                                           | 1         | 1.6     |
| oral, shampoo, bodysoap, soap, eyemakeup, makeup, face, lotion, skinclea                          | 1         | 1.6     |
| oral, condit, shampoo                                                                             | 1         | 1.6     |
| oral, condit, shampoo, bodysoap, eyemakeup, makeup, face, lotion, hair, skinclea, lip             | 1         | 1.6     |
| oral, condit, shampoo, bodysoap, soap, lip                                                        | 1         | 1.6     |
| oral, condit, shampoo, bodysoap, soap, lotion, hair, skinclea                                     | 1         | 1.6     |
| oral, condit, shampoo, bodysoap, soap, eyemakeup, face, lotion, skinclea                          | 1         | 1.6     |
| oral, condit, shampoo, bodysoap, soap, eyemakeup, makeup, face, hair                              | 1         | 1.6     |
| oral, condit, shampoo, bodysoap, soap, eyemakeup, makeup, face, lotion, skinclea                  | 1         | 1.6     |
| anti, condit, shampoo, bodysoap, soap, eyemakeup, makeup, face, lotion, hair                      | 1         | 1.6     |
| anti, oral, eyemakeup, makeup, lotion                                                             | 1         | 1.6     |
| anti, oral, soap, face, lotion, hair                                                              | 1         | 1.6     |
| anti, oral, soap, makeup, face, lotion, skinclea                                                  | 1         | 1.6     |
| anti, oral, bodysoap, soap, eyemakeup, makeup, face, lotion, hair, lip                            | 1         | 1.6     |
| anti, oral, shampoo, bodysoap, face, skinclea                                                     | 1         | 1.6     |
| anti, oral, shampoo, bodysoap, soap                                                               | 1         | 1.6     |
| anti, oral, shampoo, bodysoap, soap, skinclea                                                     | 1         | 1.6     |
| anti, oral, shampoo, bodysoap, soap, hair                                                         | 1         | 1.6     |
| anti, oral, shampoo, bodysoap, soap, lotion, skinclea                                             | 1         | 1.6     |
| anti, oral, shampoo, bodysoap, soap, face                                                         | 1         | 1.6     |
| anti, oral, condit, shampoo, bodysoap, face, lotion, hair                                         | 1         | 1.6     |

Table S1. Cont.

| PCP Combination                                                                             | No. Users | % Users |
|---------------------------------------------------------------------------------------------|-----------|---------|
| anti, oral, condit, shampoo, bodysoap, face, lotion, hair, skinlea, lip                     | 1         | 1.6     |
| anti, oral, condit, shampoo, bodysoap, makeup, face, lotion                                 | 1         | 1.6     |
| anti, oral, condit, shampoo, bodysoap, eyemakeup, face, lotion                              | 1         | 1.6     |
| anti, oral, condit, shampoo, bodysoap, eyemakeup, face, lotion, skinlea, lip                | 1         | 1.6     |
| anti, oral, condit, shampoo, bodysoap, eyemakeup, makeup, face, lotion, hair, skinlea, lip  | 1         | 1.6     |
| anti, oral, condit, shampoo, bodysoap, soap, skinlea                                        | 1         | 1.6     |
| anti, oral, condit, shampoo, bodysoap, soap, lotion, skinlea                                | 1         | 1.6     |
| anti, oral, condit, shampoo, bodysoap, soap, face, lip                                      | 1         | 1.6     |
| anti, oral, condit, shampoo, bodysoap, soap, face, hair                                     | 1         | 1.6     |
| anti, oral, condit, shampoo, bodysoap, soap, face, lotion                                   | 1         | 1.6     |
| anti, oral, condit, shampoo, bodysoap, soap, face, lotion, skinlea                          | 1         | 1.6     |
| anti, oral, condit, shampoo, bodysoap, soap, face, lotion, hair, skinlea                    | 1         | 1.6     |
| anti, oral, condit, shampoo, bodysoap, soap, makeup, face, skinlea                          | 1         | 1.6     |
| anti, oral, condit, shampoo, bodysoap, soap, makeup, face, lotion, hair                     | 1         | 1.6     |
| anti, oral, condit, shampoo, bodysoap, soap, makeup, face, lotion, skinlea, lip             | 1         | 1.6     |
| anti, oral, condit, shampoo, bodysoap, soap, eyemakeup, face, lotion, hair, skinlea         | 1         | 1.6     |
| anti, oral, condit, shampoo, bodysoap, soap, eyemakeup, makeup, hair, skinlea               | 1         | 1.6     |
| anti, oral, condit, shampoo, bodysoap, soap, eyemakeup, makeup, lotion, hair                | 1         | 1.6     |
| anti, oral, condit, shampoo, bodysoap, soap, eyemakeup, makeup, lotion, hair, skinlea, lip  | 1         | 1.6     |
| anti, oral, condit, shampoo, bodysoap, soap, eyemakeup, makeup, face, lotion, lip           | 1         | 1.6     |
| anti, oral, condit, shampoo, bodysoap, soap, eyemakeup, makeup, face, lotion, hair, lip     | 1         | 1.6     |
| anti, oral, condit, shampoo, bodysoap, soap, eyemakeup, makeup, face, lotion, hair, skinlea | 1         | 1.6     |

**Table S2.** Unique PCP co-use combinations for participants during the weekend 48 h time period (T1B). 66 of the 67 participants reported PCP co-use (use of more than 1 PCP in a 48 h period). There were 62 unique co-use combinations for the 66 participants.

| PCP Combination                                                                                  | No. Users | % Users |
|--------------------------------------------------------------------------------------------------|-----------|---------|
| anti, oral, condit, shampoo, bodysoap, soap, eyemakeup, makeup, face, lotion, hair, skinlea, lip | 3         | 4.5     |
| anti, oral, condit, shampoo, bodysoap, eyemakeup, makeup, face, lotion, hair, skinlea            | 2         | 3.0     |
| oral, shampoo, bodysoap, soap                                                                    | 2         | 3.0     |
| shampoo, bodysoap, lotion                                                                        | 1         | 1.5     |
| condit, shampoo, bodysoap, eyemakeup, makeup, lotion, skinlea, lip                               | 1         | 1.5     |
| oral, face, lip                                                                                  | 1         | 1.5     |
| oral, eyemakeup, makeup, face, lotion, lip                                                       | 1         | 1.5     |
| oral, soap, face, lotion                                                                         | 1         | 1.5     |
| oral, bodysoap, face, lotion, skinlea                                                            | 1         | 1.5     |
| oral, bodysoap, soap, eyemakeup, makeup, lotion, lip                                             | 1         | 1.5     |
| oral, shampoo, eyemakeup, makeup, lotion, lip                                                    | 1         | 1.5     |
| oral, shampoo, soap, eyemakeup, makeup, face, lotion, hair, skinlea                              | 1         | 1.5     |
| oral, shampoo, bodysoap, face, lotion, hair, lip                                                 | 1         | 1.5     |
| oral, shampoo, bodysoap, soap, face, lotion, skinlea                                             | 1         | 1.5     |
| oral, shampoo, bodysoap, soap, face, lotion, hair, skinlea                                       | 1         | 1.5     |
| oral, condit, shampoo, eyemakeup, makeup, hair, skinlea                                          | 1         | 1.5     |
| oral, condit, shampoo, eyemakeup, makeup, lotion, hair, skinlea                                  | 1         | 1.5     |
| oral, condit, shampoo, soap, face, lotion, skinlea, lip                                          | 1         | 1.5     |
| oral, condit, shampoo, soap, eyemakeup, lotion, lip                                              | 1         | 1.5     |
| oral, condit, shampoo, bodysoap, makeup, face                                                    | 1         | 1.5     |
| oral, condit, shampoo, bodysoap, eyemakeup, lotion, lip                                          | 1         | 1.5     |
| oral, condit, shampoo, bodysoap, eyemakeup, makeup, face, skinlea, lip                           | 1         | 1.5     |
| oral, condit, shampoo, bodysoap, eyemakeup, makeup, face, lotion, hair, skinlea                  | 1         | 1.5     |
| oral, condit, shampoo, bodysoap, eyemakeup, makeup, face, lotion, hair, skinlea, lip             | 1         | 1.5     |
| oral, condit, shampoo, bodysoap, soap, lotion, skinlea                                           | 1         | 1.5     |
| oral, condit, shampoo, bodysoap, soap, eyemakeup, makeup, skinlea                                | 1         | 1.5     |
| anti, shampoo, bodysoap, soap, eyemakeup, face, lotion, hair, skinlea                            | 1         | 1.5     |
| anti, oral, soap, lotion, skinlea                                                                | 1         | 1.5     |
| anti, oral, soap, lotion, hair, skinlea                                                          | 1         | 1.5     |
| anti, oral, soap, face, lotion                                                                   | 1         | 1.5     |
| anti, oral, bodysoap                                                                             | 1         | 1.5     |
| anti, oral, bodysoap, soap                                                                       | 1         | 1.5     |
| anti, oral, shampoo, bodysoap, soap, lotion                                                      | 1         | 1.5     |
| anti, oral, shampoo, bodysoap, soap, lotion, skinlea                                             | 1         | 1.5     |
| anti, oral, condit, shampoo, lotion, skinlea                                                     | 1         | 1.5     |
| anti, oral, condit, shampoo, bodysoap, skinlea                                                   | 1         | 1.5     |
| anti, oral, condit, shampoo, bodysoap, hair, skinlea                                             | 1         | 1.5     |
| anti, oral, condit, shampoo, bodysoap, face, lotion                                              | 1         | 1.5     |
| anti, oral, condit, shampoo, bodysoap, face, lotion, skinlea                                     | 1         | 1.5     |
| anti, oral, condit, shampoo, bodysoap, face, lotion, hair, lip                                   | 1         | 1.5     |
| anti, oral, condit, shampoo, bodysoap, face, lotion, hair, skinlea                               | 1         | 1.5     |

Table S2. Cont.

| PCP Combination                                                                             | No. Users | % Users |
|---------------------------------------------------------------------------------------------|-----------|---------|
| anti, oral, condit, shampoo, bodysoap, makeup, lip                                          | 1         | 1.5     |
| anti, oral, condit, shampoo, bodysoap, eyemakeup, face, lotion, skinlea                     | 1         | 1.5     |
| anti, oral, condit, shampoo, bodysoap, eyemakeup, makeup, lotion, skinlea, lip              | 1         | 1.5     |
| anti, oral, condit, shampoo, bodysoap, eyemakeup, makeup, face, hair, lip                   | 1         | 1.5     |
| anti, oral, condit, shampoo, bodysoap, eyemakeup, makeup, face, lotion                      | 1         | 1.5     |
| anti, oral, condit, shampoo, bodysoap, soap, hair                                           | 1         | 1.5     |
| anti, oral, condit, shampoo, bodysoap, soap, lotion                                         | 1         | 1.5     |
| anti, oral, condit, shampoo, bodysoap, soap, face                                           | 1         | 1.5     |
| anti, oral, condit, shampoo, bodysoap, soap, face, lotion                                   | 1         | 1.5     |
| anti, oral, condit, shampoo, bodysoap, soap, face, lotion, lip                              | 1         | 1.5     |
| anti, oral, condit, shampoo, bodysoap, soap, face, lotion, skinlea                          | 1         | 1.5     |
| anti, oral, condit, shampoo, bodysoap, soap, makeup, lotion, lip                            | 1         | 1.5     |
| anti, oral, condit, shampoo, bodysoap, soap, makeup, lotion, skinlea                        | 1         | 1.5     |
| anti, oral, condit, shampoo, bodysoap, soap, makeup, face, lotion, skinlea, lip             | 1         | 1.5     |
| anti, oral, condit, shampoo, bodysoap, soap, makeup, face, lotion, hair                     | 1         | 1.5     |
| anti, oral, condit, shampoo, bodysoap, soap, makeup, face, lotion, hair, skinlea, lip       | 1         | 1.5     |
| anti, oral, condit, shampoo, bodysoap, soap, eyemakeup, face, lotion, skinlea               | 1         | 1.5     |
| anti, oral, condit, shampoo, bodysoap, soap, eyemakeup, makeup, lotion, skinlea, lip        | 1         | 1.5     |
| anti, oral, condit, shampoo, bodysoap, soap, eyemakeup, makeup, face, skinlea               | 1         | 1.5     |
| anti, oral, condit, shampoo, bodysoap, soap, eyemakeup, makeup, face, lotion, skinlea       | 1         | 1.5     |
| anti, oral, condit, shampoo, bodysoap, soap, eyemakeup, makeup, face, lotion, hair, skinlea | 1         | 1.5     |

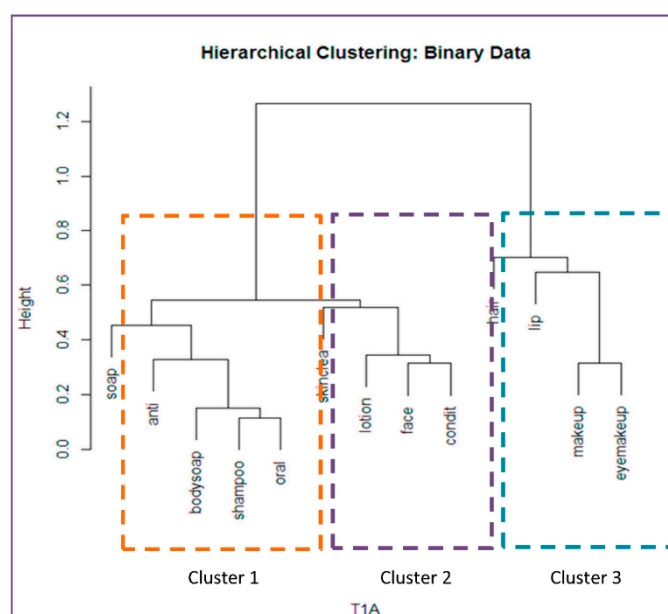

Figure S1. Dendrogram representing hierarchical clustering from study time period T1A weekday (48 h, weekdays, n = 63).

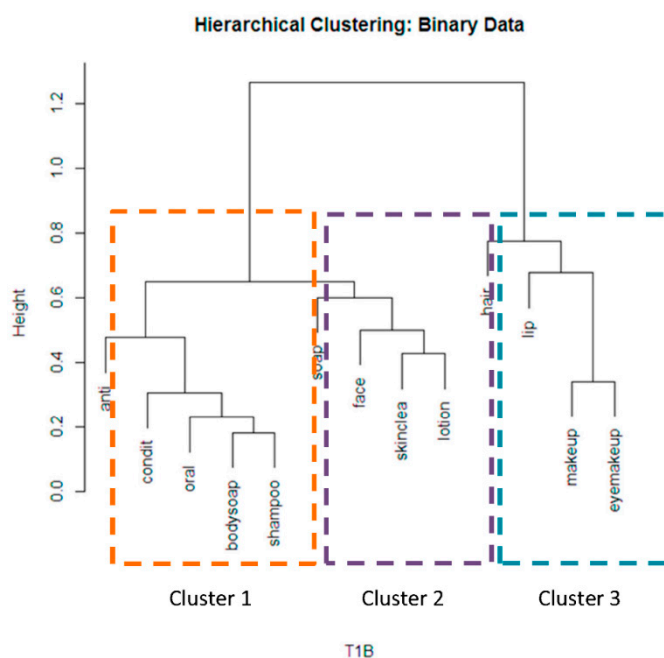

**Figure S2.** Dendrogram representing hierarchial clustering from study time period T1B weekend (48 h, weekend,  $n = 67$ ).

### Abbreviations/Definitions

PCP: personal care product

T1A: first trimester study period, weekday

T1B: first trimester study period, weekend

makeup: general makeup and cosmetics

lip: lip products

eyemakeup: eye makeup and cosmetics

hair: hairstyling products

condit: conditioner

bodysoap: body soaps

skincea: facial soaps, cleansers and washes

oral: toothpaste and mouthwash

soap: hand soaps, sanitizers and soap not otherwise specified

anti: deodorant and antiperspirants

lotion: body lotions, creams and oils

face: face lotions and creams

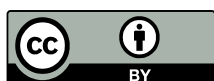

© 2016 by the authors; licensee MDPI, Basel, Switzerland. This article is an open access article distributed under the terms and conditions of the Creative Commons by Attribution (CC-BY) license (<http://creativecommons.org/licenses/by/4.0/>).
